# Supplementary material for: VLDL-specific increases of fatty acids in autism spectrum disorder correlate with social interaction
Source: PubMed Central journal article supplement — eBioMedicine. 2020 Jul 30;58:102917. doi: 10.1016/j.ebiom.2020.102917 (PMC7393524; doi:10.1016/j.ebiom.2020.102917), 2020-07-30
Supplement: mmc2.pdf [file mmc2.pdf]

## CERTIFICATE OF EDITING

This is to certify that the paper titled VLDL-specific increases of fatty acids in autism spectrum disorder correlate with social interaction commissioned to us by Hideo Matsuzaki has been edited for English language, grammar, punctuation, and spelling by Enago, the editing brand of Crimson Interactive Pvt. Ltd under Advance Editing.

- ✓ **ISO 17100:2015**  
Translation Service Providers
- ✓ **ISO 27001:2013**  
Information Security Management System
- ✓ **ISO 9001:2015**  
Quality Management System

Issued by:   
Enago, Crimson Interactive Pvt. Ltd.  
1001, Techniplex - II, S. V. Road,  
Goregaon (W), Mumbai 400062, India.  
Phone: 03-5050-5374  
Fax: 03-4496-4934

**Disclaimer:** The author is free to accept or reject our changes in the document after our editing. However, we do not bear responsibility for revisions made to the document after our edit on 7 Jun 2020.

**Japan** www.enago.jp, www.ulatus.jp, www.voxtab.jp  
**Taiwan** www.enago.tw, www.ulatus.tw  
**China** www.enago.cn, www.ulatus.cn  
**Brazil** www.enago.com.br, www.ulatus.com.br  
**Germany** www.enago.de

**Russia** www.enago.ru  
**Arabic** www.enago.ae  
**Turkey** www.enago.com.tr  
**S. Korea** www.enago.co.kr  
**Global** www.enago.com, www.ulatus.com, www.voxtab.com

### About Crimson:

Crimson Interactive pvt ltd is one of the world's leading academic research support services. Since 2005, we've supported over 2 million researchers in 125 countries with their publication goals.
